# Supplementary material for: Structure engineering of CeO2for boosting the Au/CeO2nanocatalyst in the green and selective hydrogenation of nitrobenzene
Source: Royal Society of Chemistry journal article supplement (doi:10.1039/d3nh00103b), 2023-01-01
Supplement: d3nh00103b1.pdf [file d3nh00103b1.pdf]

## Supporting Information

### Structure Engineering of CeO<sub>2</sub> for Boosting Au/CeO<sub>2</sub> Nano-catalyst in Green and Selective Hydrogenation of Nitrobenzene

Junqing Ye,<sup>a,b</sup> Meizan Jing,<sup>c</sup> Yu Liang,<sup>a</sup> Wenjin Li,<sup>a</sup> Wanting Zhao,<sup>a</sup> Jianying

Huang,<sup>d,e</sup> Yuekun Lai,<sup>d,e,\*</sup> Weiyu Song,<sup>c</sup> Jian Liu,<sup>c</sup> and Jian Sun<sup>a,f,\*</sup>

<sup>a</sup> School of Life Science, Beijing Institute of Technology, Beijing 100081, P.R. China

<sup>b</sup> Jiangsu Key Laboratory of Advanced Catalytic Materials and Technology, Advanced Catalysis and Green Manufacturing Collaborative Innovation Center, School of Petrochemical Engineering, Changzhou University, Changzhou 213164, P.R. China

<sup>c</sup> State Key Laboratory of Heavy Oil Processing, College of Science, China University of Petroleum-Beijing, Beijing 102249, P.R. China

<sup>d</sup> College of Chemical Engineering, Fuzhou University, Fuzhou 350116, P.R. China

<sup>e</sup> Qingyuan Innovation Laboratory, Quanzhou 362801, P.R. China

<sup>f</sup> Advanced Research Institute of Multidisciplinary Science, Beijing Institute of Technology, Beijing 100081, P.R. China

\*Corresponding E-mail: yklai@fzu.edu.cn (Y. Lai), jiansun@bit.edu.cn (J. Sun)

## Supporting Tables and Figures

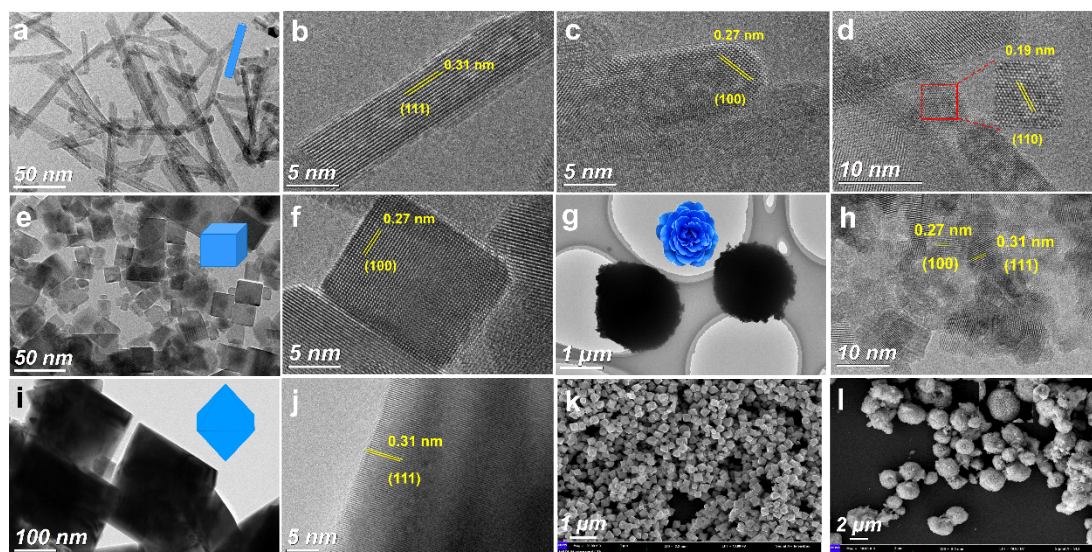

**Figure S1.** TEM and HRTEM images of CeO<sub>2</sub>-rod (a, b, c, and d) and CeO<sub>2</sub>-cube (e, f). TEM, HRTEM, and SEM images of CeO<sub>2</sub>-flower (g, h, and l) and CeO<sub>2</sub>-octa (i, j, and k).

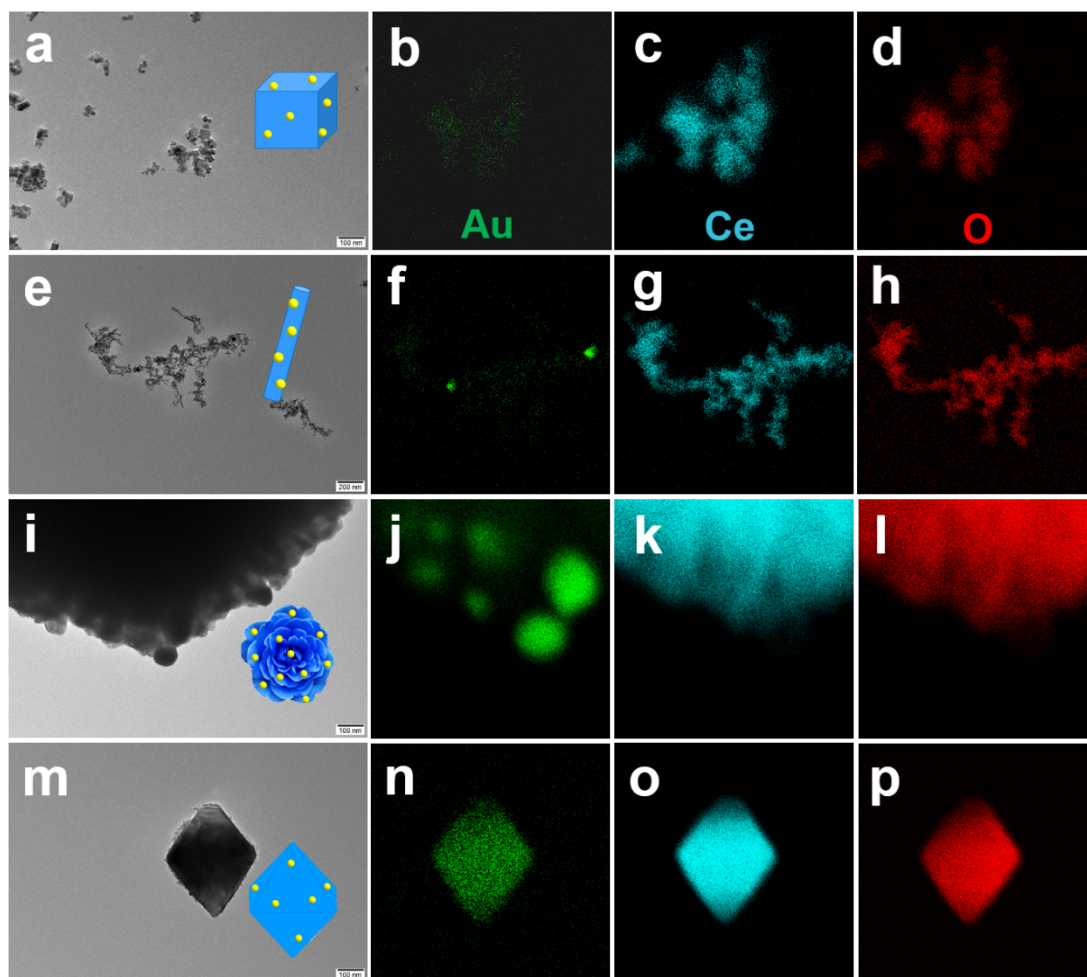

**Figure S2.** TEM images and EDS mapping results of Au/CeO<sub>2</sub> catalysts. Au/CeO<sub>2</sub>-cube (a, b, c, and d), Au/CeO<sub>2</sub>-rod (e, f, g, and h), Au/CeO<sub>2</sub>-flower (i, j, k, and l), and Au/CeO<sub>2</sub>-octa (m, n, o, and p).

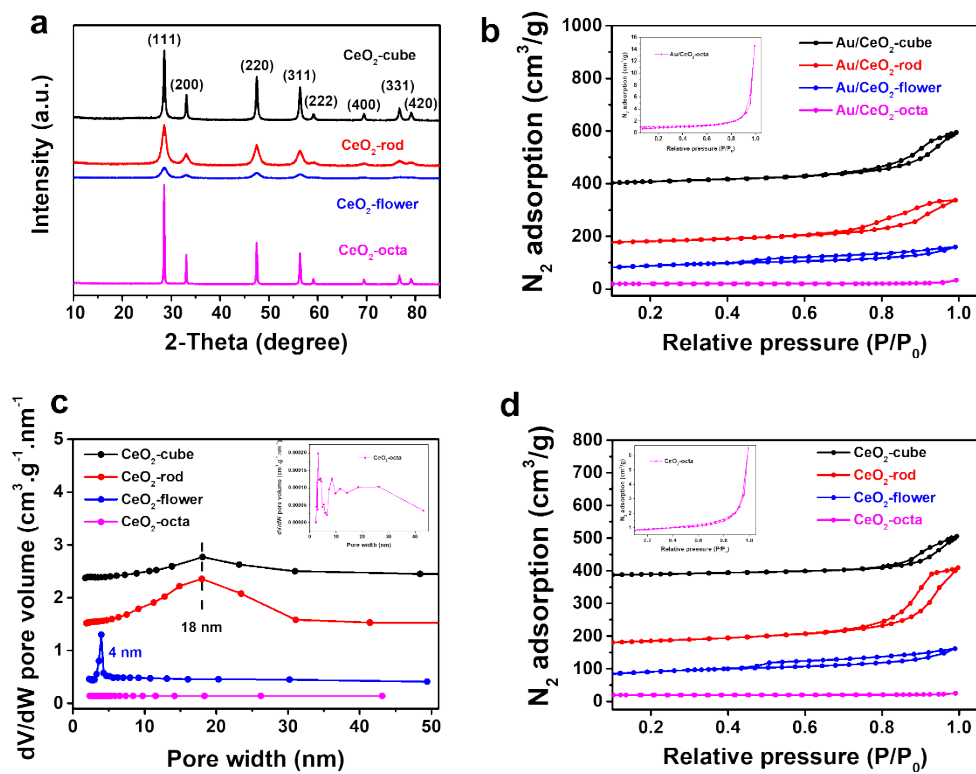

**Figure S3.** XRD patterns of various CeO<sub>2</sub> (a), N<sub>2</sub> adsorption and desorption isotherms of various Au/CeO<sub>2</sub> (b), BJH pore size distribution curves (c) and N<sub>2</sub> adsorption and desorption isotherms (d) of CeO<sub>2</sub> with different shapes.

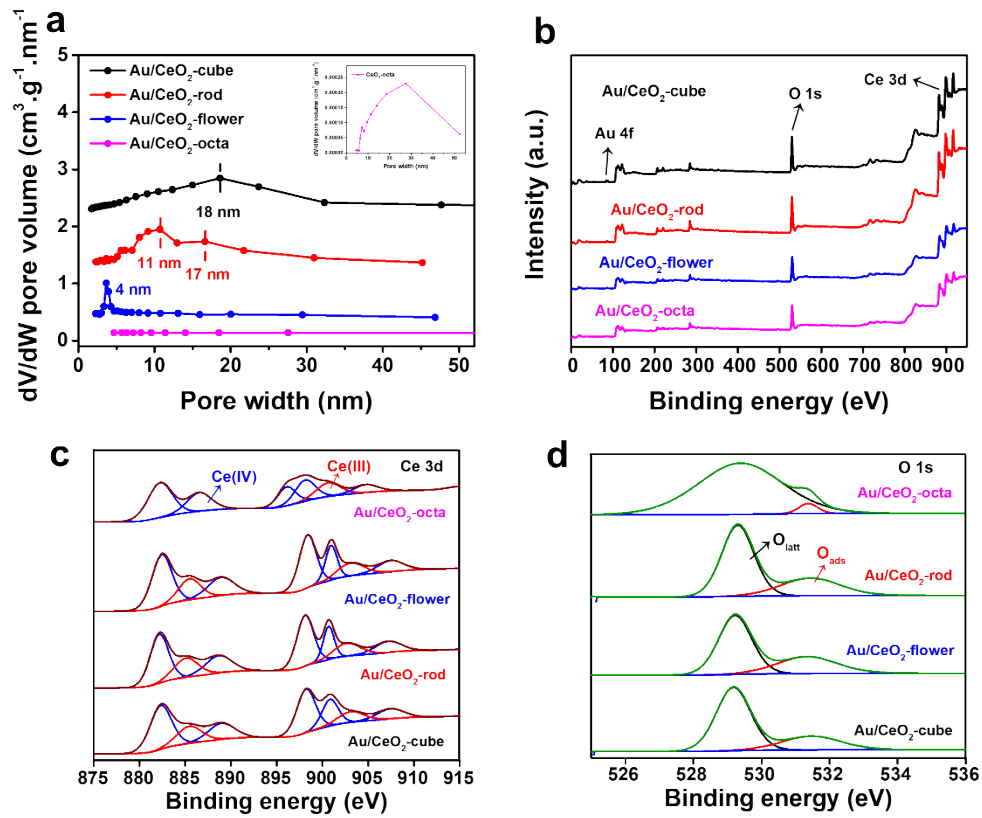

**Figure S4.** BJH pore size distribution curves (a) and full XPS spectra of various Au/CeO<sub>2</sub> samples

(b), XPS results of various Au/CeO<sub>2</sub> samples: Ce 3d (c), O 1s (d).

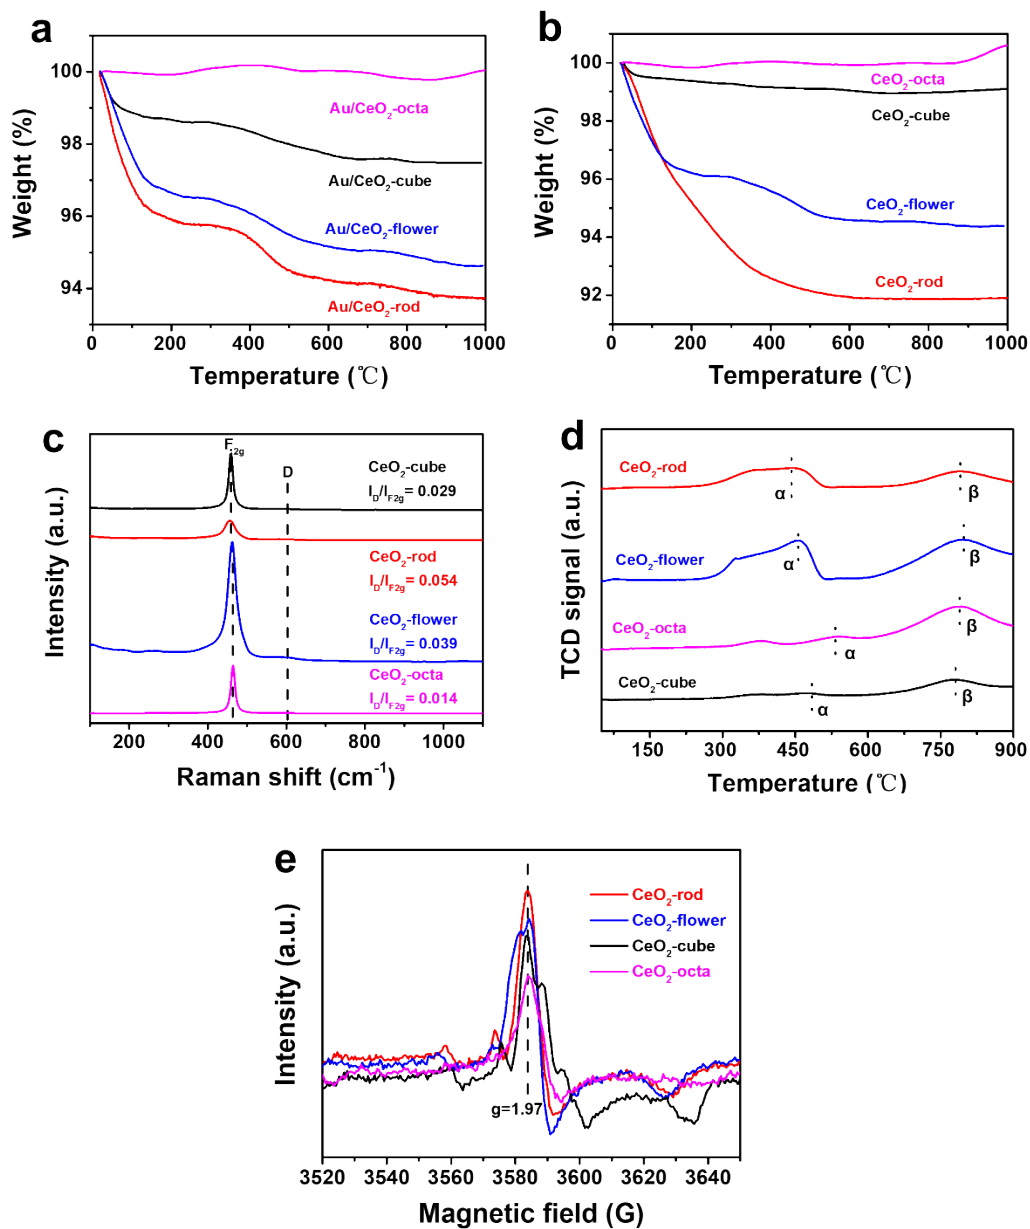

**Figure S5.** TGA curves of various Au/CeO<sub>2</sub> (a), TGA curves (b), Raman spectra (c), and H<sub>2</sub>-TPR results (d), ESR spectra (e) of CeO<sub>2</sub> with different shapes.

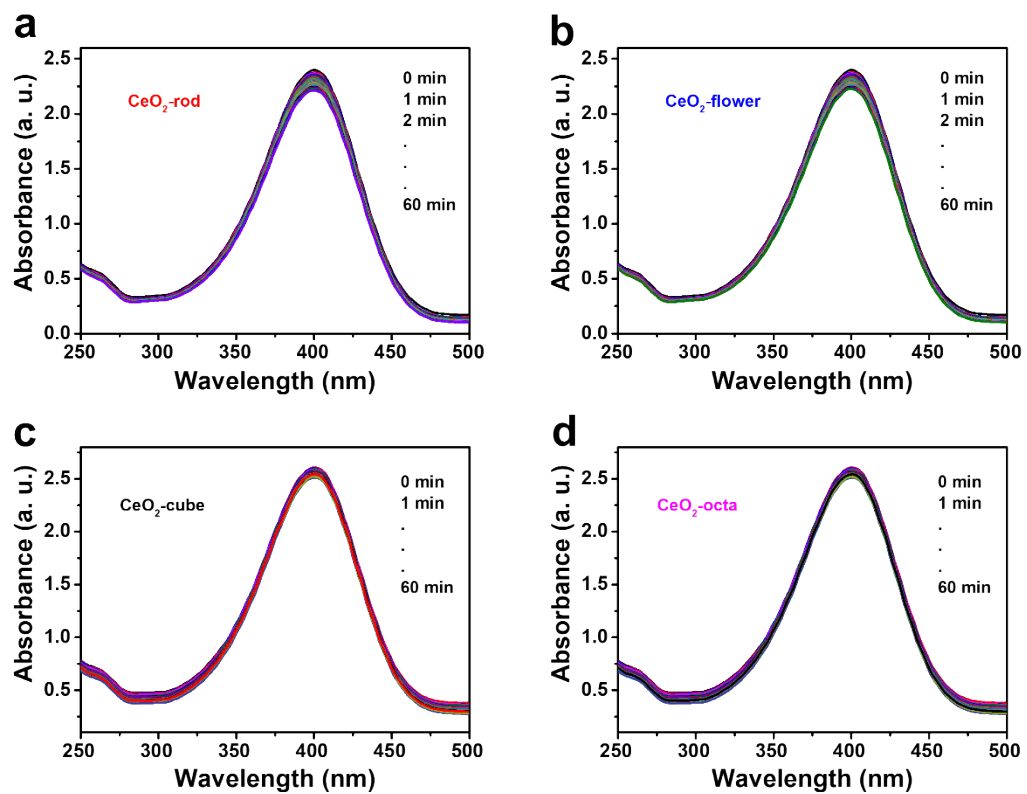

**Figure S6.** UV-Vis spectra obtained from 4-NP reduction with NaBH<sub>4</sub> at the time interval of 1 min in the presence of CeO<sub>2</sub>-cube (a), CeO<sub>2</sub>-rod (b), CeO<sub>2</sub>-flower (c), CeO<sub>2</sub>-octa (d).

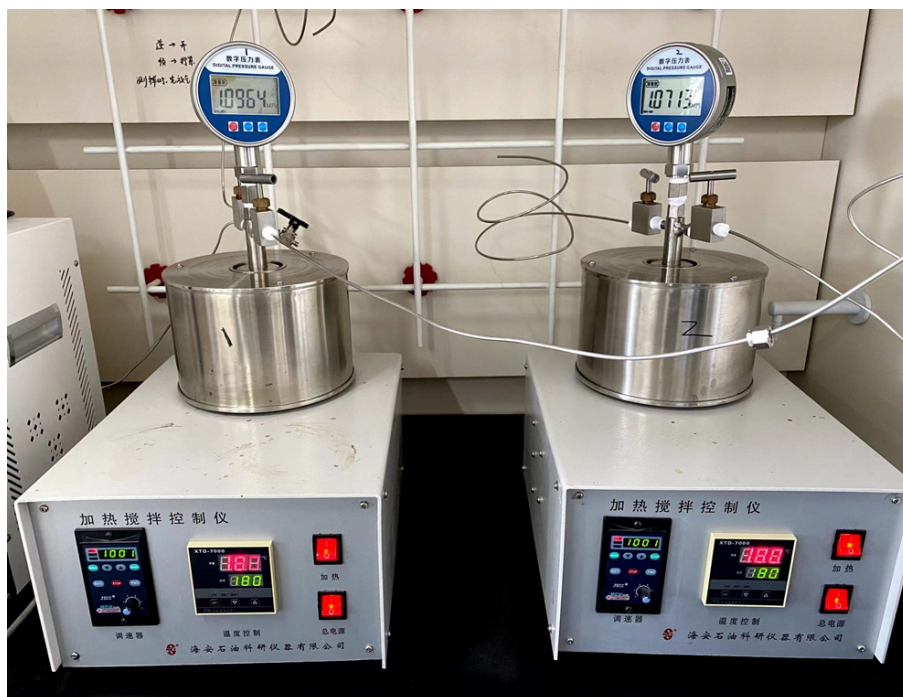

Figure S7. Experimental device for catalytic transfer hydrogenation of nitrobenzene.



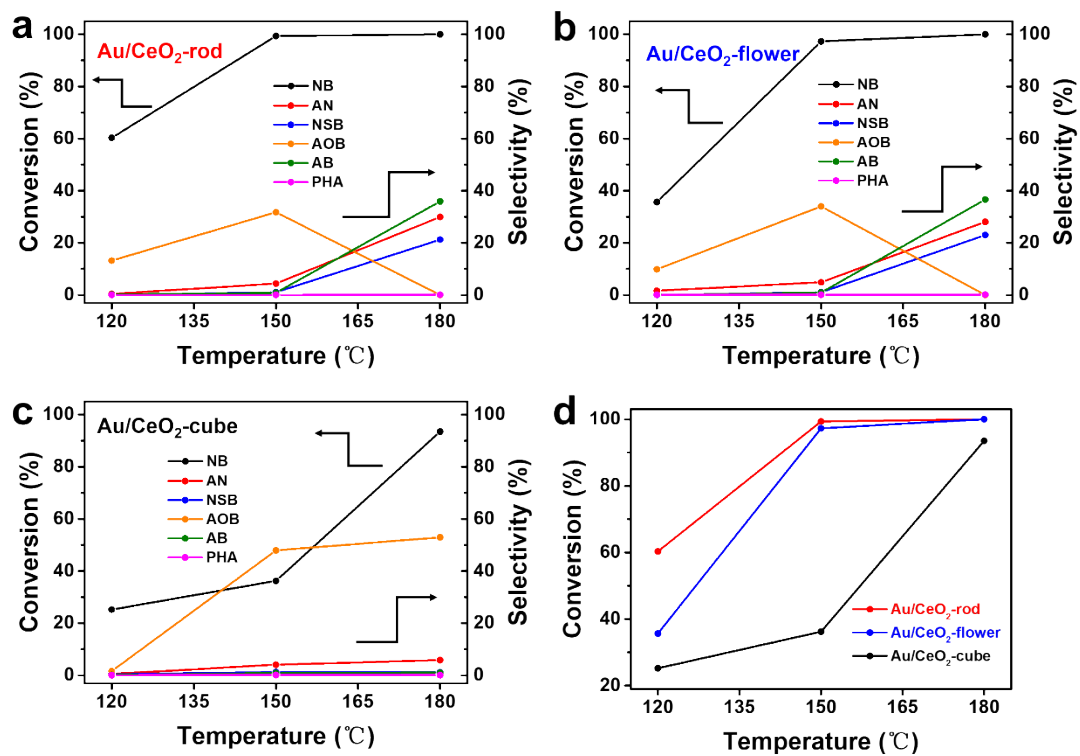

**Figure S8.** Effect of reaction temperature on the catalytic transfer hydrogenation of nitrobenzene over Au/CeO<sub>2</sub>-rod (a), Au/CeO<sub>2</sub>-flower (b), Au/CeO<sub>2</sub>-cube (c), and the comparison of conversion of nitrobenzene over various Au/CeO<sub>2</sub> (d). Reaction conditions: 0.06 mL of NB, 5 mL of isopropanol, 50 mg of Au/CeO<sub>2</sub> catalyst, 6 h.

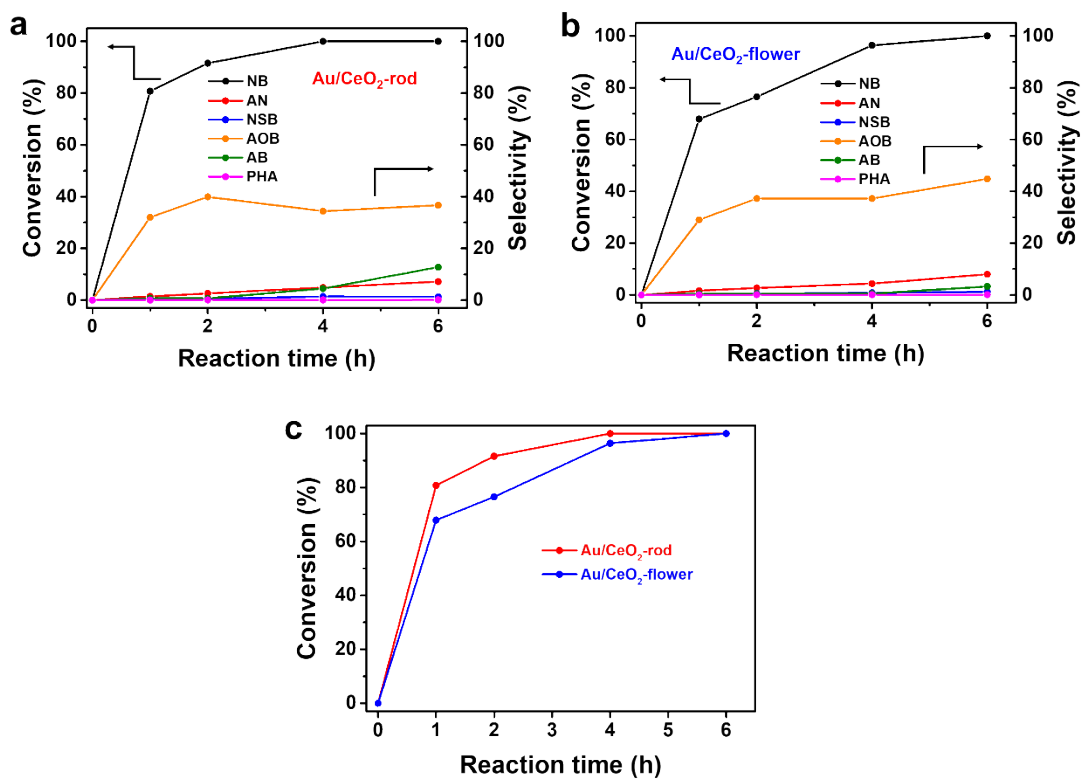

**Figure S9.** Effect of reaction time on the catalytic transfer hydrogenation of nitrobenzene over Au/CeO<sub>2</sub>-rod (a), Au/CeO<sub>2</sub>-flower (b), and the comparison of conversion of nitrobenzene over different Au/CeO<sub>2</sub> (c). Reaction conditions: 0.06 mL of NB, 5 mL of isopropanol, 30 mg of Au/CeO<sub>2</sub> catalyst, 180 °C.

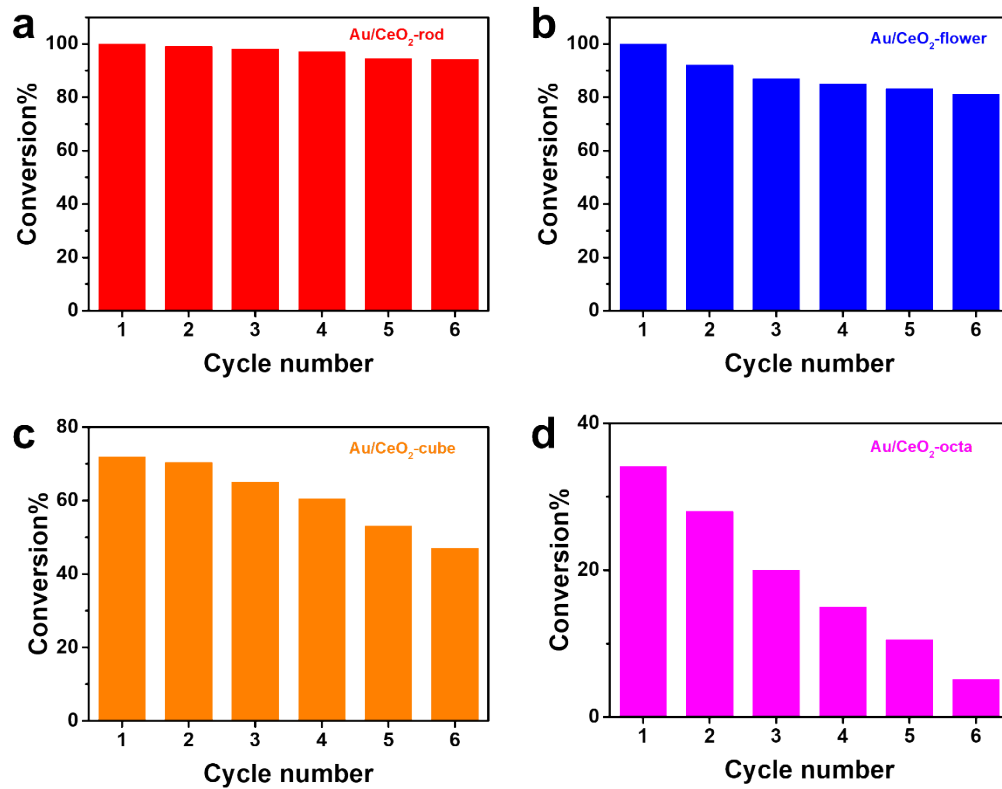

**Figure S10.** Recycling of various Au/CeO<sub>2</sub> for catalytic transfer hydrogenation of NB. Reaction conditions: 0.06 mL of NB, 30 mg of Au/CeO<sub>2</sub>, 5 mL of isopropanol, 180 °C, and 6 h.

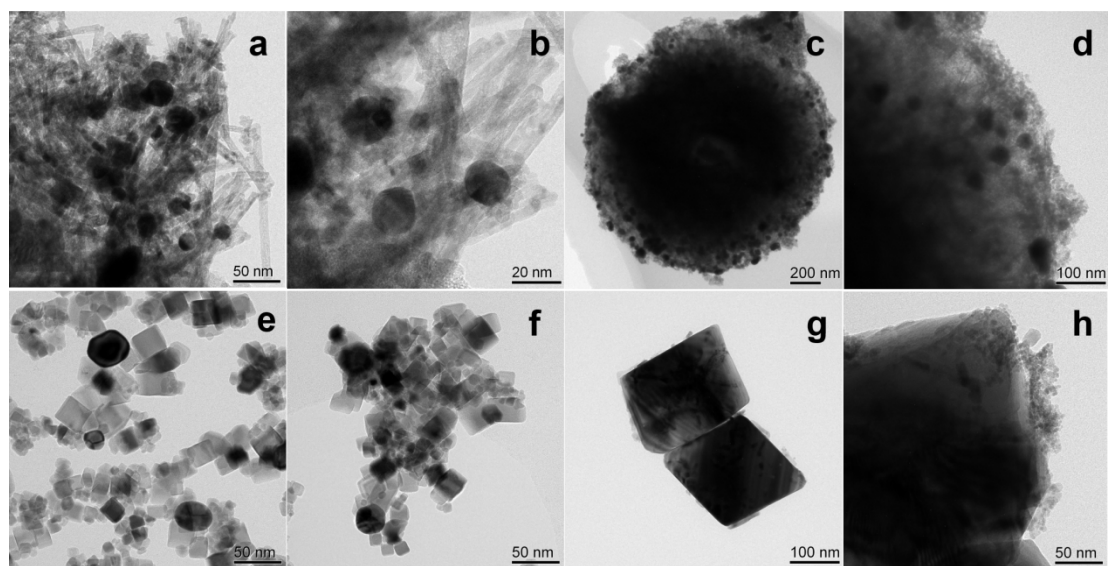

**Figure S11.** TEM images of spent Au/CeO<sub>2</sub> catalysts. Au/CeO<sub>2</sub>-rod (a, b), Au/CeO<sub>2</sub>-flower (c, d), Au/CeO<sub>2</sub>-cube (e, f), Au/CeO<sub>2</sub>-octa (g, h).

**Table S1.** Effect of reaction temperature on the catalytic transfer hydrogenation of nitrobenzene over various Au/CeO<sub>2</sub> catalysts.

| Catalyst                    | Temperature<br>°C | NB<br>Conv.% | PHA<br>Sel.% | AN<br>Sel.% | NSB<br>Sel.% | AOB<br>Sel.% | AB<br>Sel.% |
|-----------------------------|-------------------|--------------|--------------|-------------|--------------|--------------|-------------|
| Au/CeO <sub>2</sub> -rod    | 120               | 60.30        | 0.029        | 0.41        | 0            | 13.23        | 0.15        |
| Au/CeO <sub>2</sub> -rod    | 150               | 99.33        | 0.044        | 4.41        | 1.05         | 31.72        | 0.85        |
| Au/CeO <sub>2</sub> -rod    | 180               | 100          | 0.111        | 29.94       | 21.23        | 0.03         | 35.91       |
| Au/CeO <sub>2</sub> -flower | 120               | 35.65        | 0.059        | 1.65        | 0            | 9.85         | 0.08        |
| Au/CeO <sub>2</sub> -flower | 150               | 97.28        | 0.054        | 4.87        | 1.04         | 33.99        | 0.96        |
| Au/CeO <sub>2</sub> -flower | 180               | 100          | 0.115        | 28.06       | 23.00        | 0            | 36.62       |
| Au/CeO <sub>2</sub> -cube   | 120               | 25.22        | 0.043        | 0.55        | 0.36         | 1.61         | 0.09        |
| Au/CeO <sub>2</sub> -cube   | 150               | 36.22        | 0.10         | 4.09        | 1.23         | 47.91        | 0.89        |
| Au/CeO <sub>2</sub> -cube   | 180               | 93.5         | 0.071        | 5.85        | 1.18         | 52.95        | 1.06        |

Reaction conditions: 0.06 mL of NB, 5 mL of isopropanol, 50 mg of Au/CeO<sub>2</sub> catalyst, 6 h.

**Table S2.** Effect of catalyst dosage on the catalytic transfer hydrogenation of nitrobenzene over various CeO<sub>2</sub>-based materials.

| Catalyst                    | Catalyst dosage (mg) | NB Conv.% | PHA Sel.% | AN Sel.% | NSB Sel.% | AOB Sel.% | AB Sel.% |
|-----------------------------|----------------------|-----------|-----------|----------|-----------|-----------|----------|
| Au/CeO <sub>2</sub> -rod    | 100                  | 100       | 0.150     | 90.5     | 2.01      | 0.08      | 0.31     |
| Au/CeO <sub>2</sub> -flower | 100                  | 100       | 0.151     | 87.1     | 5.5       | 0         | 4.0      |
| Au/CeO <sub>2</sub> -cube   | 100                  | 99.95     | 0.091     | 11.03    | 4.82      | 29.12     | 24.58    |
| CeO <sub>2</sub> -rod       | 100                  | 99.6      | 0.014     | 15.36    | 1.83      | 44.41     | 5.84     |
| CeO <sub>2</sub> -flower    | 100                  | 99.65     | 0.021     | 15.59    | 2.36      | 38.1      | 5.95     |
| CeO <sub>2</sub> -cube      | 100                  | 97.8      | 0.032     | 7.02     | 1.57      | 52.52     | 1.31     |
| Au/CeO <sub>2</sub> -rod    | 50                   | 100       | 0.111     | 29.94    | 21.23     | 0.03      | 35.91    |
| Au/CeO <sub>2</sub> -flower | 50                   | 100       | 0.115     | 28.06    | 23.00     | 0         | 36.62    |
| Au/CeO <sub>2</sub> -cube   | 50                   | 93.5      | 0.071     | 5.85     | 1.18      | 52.95     | 1.06     |
| Au/CeO <sub>2</sub> -rod    | 30                   | 100       | 0.102     | 7.16     | 1.30      | 36.67     | 12.75    |
| Au/CeO <sub>2</sub> -flower | 30                   | 100       | 0.081     | 7.97     | 1.16      | 44.8      | 3.28     |
| Au/CeO <sub>2</sub> -cube   | 30                   | 72.0      | 0.076     | 4.35     | 0.91      | 54.69     | 0.59     |
| Au/CeO <sub>2</sub> -octa   | 30                   | 34.1      | 0.01      | 0.36     | 0.00      | 1.62      | 0.12     |
| CeO <sub>2</sub> -rod       | 30                   | 100       | 0.024     | 2.10     | 1.52      | 20.79     | 0.39     |
| CeO <sub>2</sub> -flower    | 30                   | 98.05     | 0.036     | 2.31     | 1.37      | 32.69     | 0        |
| CeO <sub>2</sub> -cube      | 30                   | 38.13     | 0.049     | 1.49     | 0.37      | 24.90     | 0.08     |
| CeO <sub>2</sub> -octa      | 30                   | 20.65     | 0.008     | 0.19     | 0.00      | 1.13      | 0.10     |
| Au/CeO <sub>2</sub> -rod    | 10                   | 78.30     | 0.055     | 2.03     | 0.26      | 36.84     | 0.15     |
| Au/CeO <sub>2</sub> -flower | 10                   | 68.37     | 0.046     | 1.99     | 0.30      | 28.18     | 0.19     |
| Without cat.                | 0                    | 2.08      | trace     | trace    | trace     | trace     | trace    |

Reaction conditions: 0.06 mL of NB, 5 mL of isopropanol, CeO<sub>2</sub>-based materials, 180 °C, and 6 h.

**Table S3.** Effect of reaction time on the catalytic transfer hydrogenation of nitrobenzene over

Au/CeO<sub>2</sub>-rod and Au/CeO<sub>2</sub>-flower.

| Catalyst                    | Time (h) | NB Conv.%  | PHA Sel.%  | AN Sel.%  | NSB Sel.% | AOB Sel.%  | AB Sel.%   |
|-----------------------------|----------|------------|------------|-----------|-----------|------------|------------|
| Au/CeO <sub>2</sub> -rod    | 1        | 80.77±0.87 | 0.045±0.02 | 1.47±0.08 | 0.44±0.04 | 31.99±1.94 | 0.72±0.05  |
| Au/CeO <sub>2</sub> -rod    | 2        | 91.57±0.16 | 0.059±0.03 | 2.59±0.04 | 0.49±0.01 | 39.92±0.64 | 0.71±0.00  |
| Au/CeO <sub>2</sub> -rod    | 4        | 100±0.00   | 0.067±0.04 | 4.88±0.08 | 1.40±0.04 | 34.40±0.51 | 4.46±0.08  |
| Au/CeO <sub>2</sub> -rod    | 6        | 100±0.00   | 0.102±0.04 | 7.16±0.12 | 1.30±0.05 | 36.67±0.49 | 12.75±0.05 |
| Au/CeO <sub>2</sub> -flower | 1        | 67.88±0.41 | 0.038±0.02 | 1.63±0.05 | 0.40±0.02 | 29.03±0.57 | 0.46±0.01  |
| Au/CeO <sub>2</sub> -flower | 2        | 76.53±1.15 | 0.063±0.03 | 2.72±0.17 | 0.53±0.04 | 37.24±2.46 | 0.46±0.03  |
| Au/CeO <sub>2</sub> -flower | 4        | 96.38±0.13 | 0.053±0.02 | 4.37±0.15 | 0.82±0.01 | 37.22±1.39 | 0.51±0.01  |
| Au/CeO <sub>2</sub> -flower | 6        | 100±0.00   | 0.081±0.00 | 7.97±0.08 | 1.16±0.02 | 44.8±1.10  | 3.28±0.03  |

Reaction conditions: 0.06 mL of NB, 5 mL of isopropanol, 30 mg of Au/CeO<sub>2</sub> catalyst, 180 °C.

**Table S4.** The comparison of catalytic activity of transfer hydrogenation NB over various CeO<sub>2</sub>-based materials.

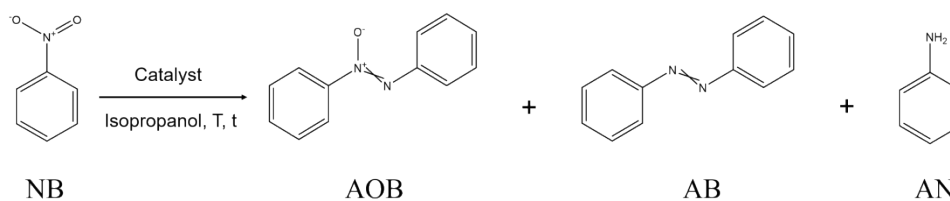

| Catalyst                    | NB Conv.% | PHA Sel.% | AN Sel.% | NSB Sel.% | AOB Sel.% | AB Sel.% |
|-----------------------------|-----------|-----------|----------|-----------|-----------|----------|
| CeO <sub>2</sub> -rod       | 100       | 0.024     | 2.10     | 1.52      | 20.79     | 0.39     |
| CeO <sub>2</sub> -flower    | 98.05     | 0.036     | 2.31     | 1.37      | 32.69     | 0        |
| CeO <sub>2</sub> -cube      | 38.13     | 0.049     | 1.49     | 0.37      | 24.90     | 0.08     |
| CeO <sub>2</sub> -octa      | 20.65     | 0.008     | 0.19     | 0.00      | 1.13      | 0.10     |
| Au/CeO <sub>2</sub> -rod    | 100       | 0.07      | 4.88     | 1.40      | 34.40     | 4.46     |
| Au/CeO <sub>2</sub> -flower | 96.38     | 0.05      | 4.37     | 0.82      | 37.22     | 0.51     |
| Au/CeO <sub>2</sub> -cube   | 55.10     | 0.08      | 2.44     | 0.97      | 37.71     | 0.35     |
| Au/CeO <sub>2</sub> -octa   | 18.21     | 0.02      | 0.48     | 0         | 3.15      | 0.08     |

Reaction conditions: 0.06 mL of NB, 5 mL of isopropanol, 30 mg of CeO<sub>2</sub>-based materials, 180 °C,

and 4 h.

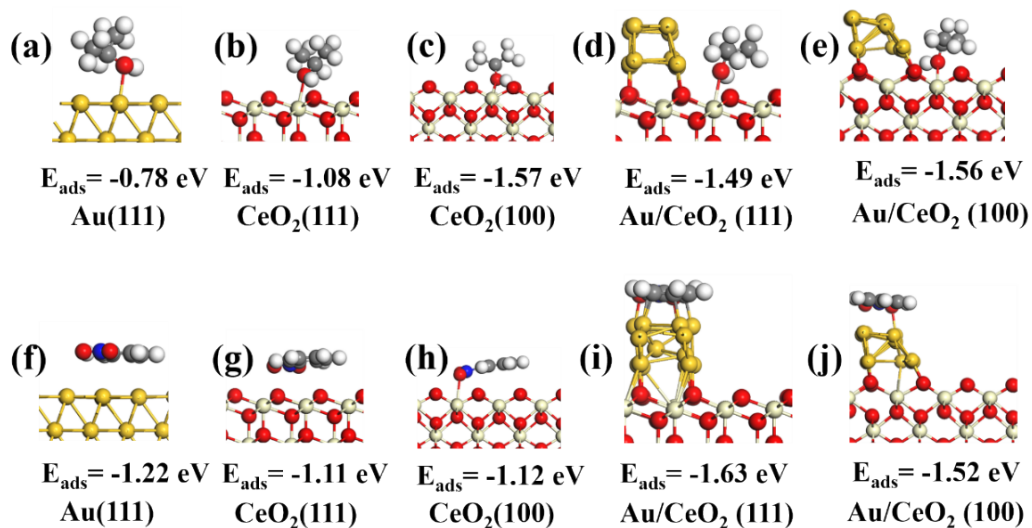

**Figure S12.** The optimized adsorption structures and calculated adsorption energies ( $E_{\text{ads}}$ ) of isopropanol on Au (111) (a), CeO<sub>2</sub>(111) (b), CeO<sub>2</sub> (100) (c), Au/CeO<sub>2</sub> (111) (d), Au/CeO<sub>2</sub> (100) (e) surfaces. The optimized adsorption structures and calculated adsorption energies ( $E_{\text{ads}}$ ) of nitrobenzene on Au (111) (f), CeO<sub>2</sub> (111) (g), CeO<sub>2</sub> (100) (h), Au/CeO<sub>2</sub> (111) (i), and Au/CeO<sub>2</sub> (100) (j) surfaces.



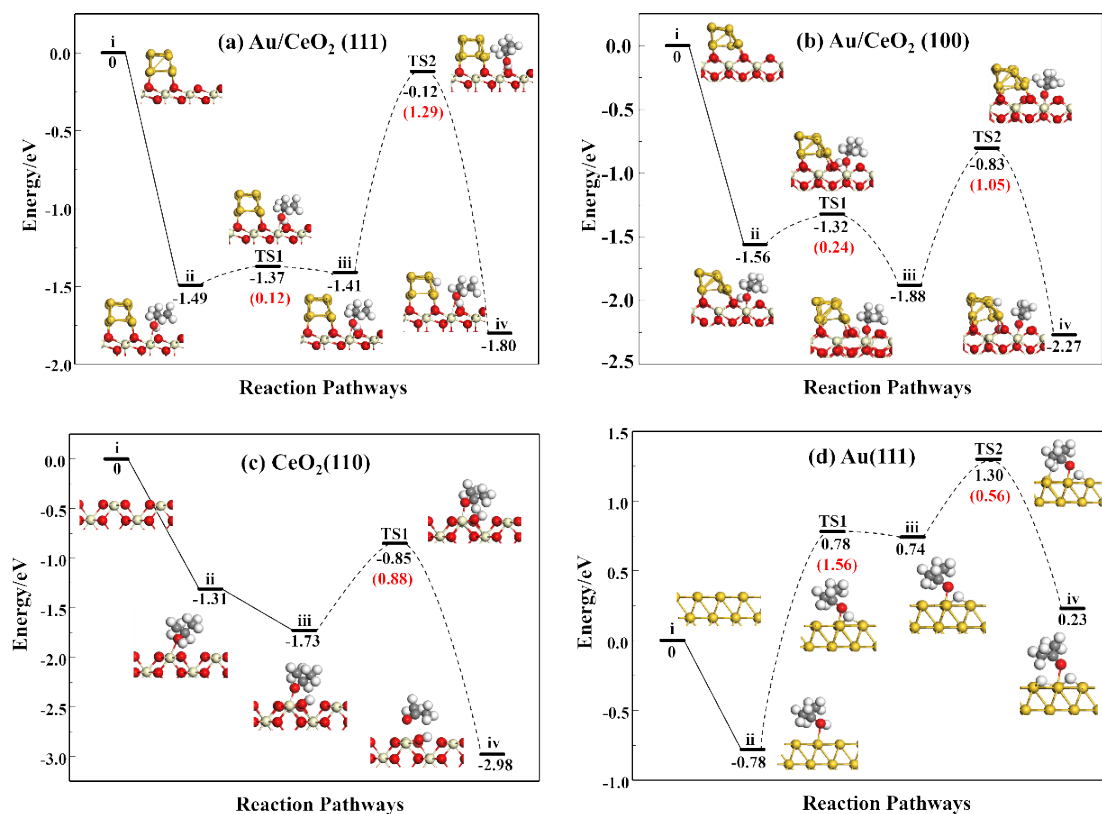

**Figure S13.** The reaction pathways for the dehydrogenation of isopropanol on Au/CeO<sub>2</sub> (111) (a), Au/CeO<sub>2</sub> (100) (b), CeO<sub>2</sub> (110) (c), and Au (111) (d) surfaces.

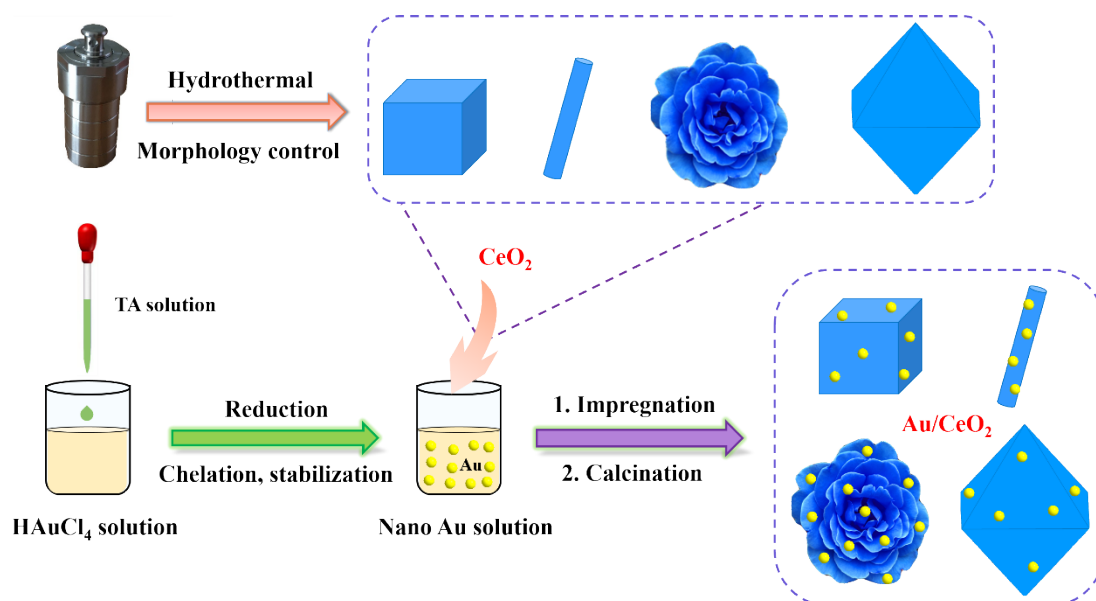

**Scheme 1.** Schematic diagram of synthesis route of Au/CeO<sub>2</sub> catalysts.

### Preparation of CeO<sub>2</sub> supports

For the typical synthesis of CeO<sub>2</sub>-rod and CeO<sub>2</sub>-cube, first, 14.18 g KOH and 0.87 g Ce(NO<sub>3</sub>)<sub>3</sub>·6H<sub>2</sub>O were dissolved in 35 mL and 5 mL of ultrapure water, respectively. Subsequently, the two solutions were mixed and stirred at 25 °C for 40 min to form a milky slurry. Next, the mixture was transferred into a Teflon bottle (100 mL), and treated at 373 K for 24 h to prepare CeO<sub>2</sub>-rod, at 453 K for 24 h to synthesis CeO<sub>2</sub>-cube. After cooling down to room temperature naturally, the precipitates were separated via centrifugation and washed with ultrapure water for 5 times, followed by drying at 60 °C in air overnight. The final powder was obtained and donated as CeO<sub>2</sub>-rod and CeO<sub>2</sub>-cube, respectively.

For the preparation of CeO<sub>2</sub>-flower, glucose (0.01 mol) was dissolved into H<sub>2</sub>O (80 mL) with stirring, which was followed by addition of acrylamide (0.015 mol) and Ce(NO<sub>3</sub>)<sub>3</sub>·6H<sub>2</sub>O (0.005 mol) to form uniform mixture. Thereafter, NH<sub>3</sub>·H<sub>2</sub>O (3.2 mL, 25wt%) was added into the mixture drop by drop with continuous stirring for 5 h, and then transferred into a 100 mL autoclave. The autoclave was heated at 180 °C for 72 h and then cooled to room temperature. Subsequently, the precipitate product was centrifuged, washed with deionized water 6 times, and dried in air at 80 °C for 12 h. Finally, the dried solid was calcined at 400 °C for 4 h in air.

For CeO<sub>2</sub>-octa, the 0.0038 g Na<sub>3</sub>PO<sub>4</sub>·12H<sub>2</sub>O was dissolved in 35 mL of deionized water under stirring, followed by mixing with 5 mL of Ce(NO<sub>3</sub>)<sub>3</sub>·6H<sub>2</sub>O (0.434g) by stirring for 1 h. The mixed solution was transferred into autoclave and kept at 200 °C for 20 h. After cooled to room temperature, the precipitate was collected by

centrifugation and subsequently washed by deionized water and ethanol several times.

The resulting powders were dried at 80 °C for 12 h and then calcined at 600 °C for 6 h in a muffle oven at a heating rate of 5 °C/min.
